# Supplementary material
Source: publisher figshare collection journal article supplement (https://springernature.figshare.com/ndownloader/files/18096443)

**(a)**

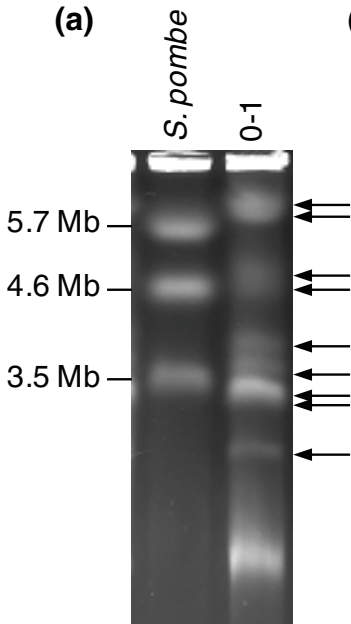

**(b)**

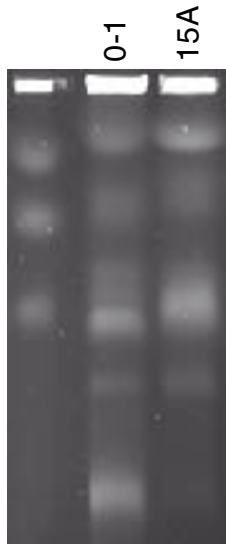

Supplement: Supplementary file 1 [file 18096443]
